# Supplementary material for: Adult murine cardiomyocytes exhibit regenerative activity with cell cycle reentry through STAT3 in the healing process of myocarditis
Source: PubMed Central journal article supplement (PMC5431117; doi:10.1038/s41598-017-01426-8), 2017-05-03
Supplement: 41598_2017_1426_MOESM1_ESM.pdf [file 41598_2017_1426_MOESM1_ESM.pdf]

## **Adult murine cardiomyocytes exhibit regenerative activity with cell cycle reentry through STAT3 in the healing process of myocarditis**

Akimitsu Miyawaki, Masanori Obana, Yusuke Mitsuhara, Aya Orimoto, Yusuke Nakayasu, Tomomi Yamashita, So-ichiro Fukada, Makiko Maeda, Hiroyuki Nakayama, Yasushi Fujio.

Supplementary materials:

### **Supplementary methods**

**Supplementary Figure S1. Cardiac tissue was restored at EAM5w**

**Supplementary Figure S2. Cardiomyocytes were efficiently labeled with eYFP**

**Supplementary Figure S3. STAT3 was activated at EAM3w**

**Supplementary Figure S4. STAT3 activation was attenuated at EAM5w**

**Supplementary Figure S5. Cardiomyocyte STAT3 was deleted in STAT3cKO mice**

**Supplementary Figure S6. Cardiac tissue restoration was impaired in STAT3cKO mice**

**Supplementary Figure S7. Capillary density was unaltered in STAT3cKO hearts**

**Supplementary Figure S8. STAT3 protected cardiomyocytes in the inflamed heart**

**Supplementary Figure S9. IL-11 administration enhanced cardiomyocyte proliferation at EAM3w**

**Supplementary Figure S10. Rigid collagen fiber was observed in the injured area at EAM5w**

**Supplementary Figure S11. Meis1 expression was unchanged in EAM model**

**Supplementary Table S1. Echocardiographic analysis of STAT3fl/fl and STAT3cKO mice**

**Supplementary Table S2. Antibodies**

**Supplementary Table S3. Primer sequences**

## **Supplementary methods**

### **Capillary density quantification**

Heart sections were fixed with acetone for 15 min. The endogenous peroxidase was silenced with 0.3% H<sub>2</sub>O<sub>2</sub> in methanol, followed by blocking with 3% bovine serum albumin (BSA). Anti-CD31 primary antibody and biotin-linked secondary antibody were applied at 1/200 in sequence. Vectastain ABC kit (Vector Laboratories) and DAKO® Liquid DAB + (DAKO) were used for staining. The number of CD31<sup>+</sup> cells was counted by a researcher who was blinded to the experimental condition, and capillary density at post-inflamed regions was calculated by dividing the number by the area of post-inflamed regions.

### **IL-11 administration**

IL-11 (0.5 µg in 200 µL PBS) was intravenously administered in mice at EAM3w, followed by four times of intraperitoneal BrdU administration. The heart sections were collected 24 hours after the last BrdU injection and subjected to immunofluorescence staining.

### **Picrosirius red staining**

Picrosirius red staining was performed using Picro-Sirius Red Stain Kit (Scytek) according to manufacturer's protocol. Briefly, frozen heart sections were fixed with 4% PFA for 15 min. After rinsing in distilled water, the sections were incubated with Picro-sirius Red Solution for 60 min, followed by two quick rinses in 0.5% Acetic Acid Solution. Dehydration in absolute ethanol was performed prior to clearing and mounting.

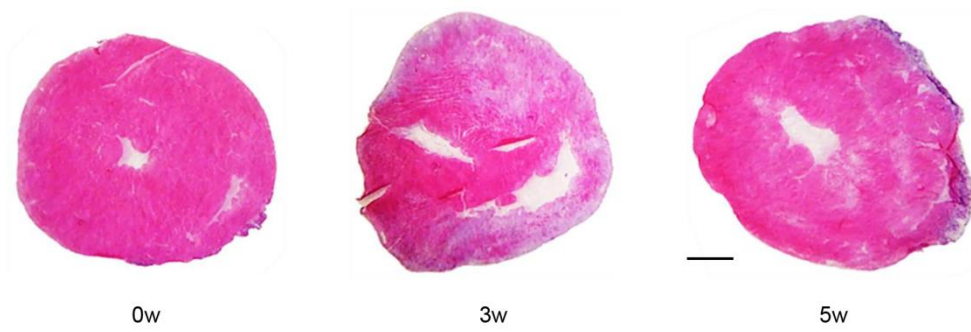

**Supplementary Figure S1. Cardiac tissue was restored at EAM5w.**

The entire HE-stained cross sections of EAM0w, EAM3w and EAM5w hearts are shown.  
Scale bar: 1 mm.

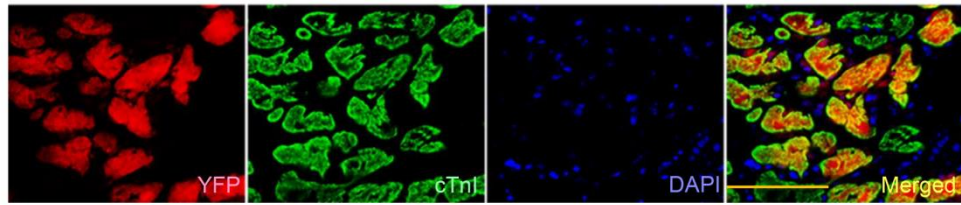

**Supplementary Figure S2. Cardiomyocytes were efficiently labeled with eYFP.**

Cardiomyocytes were labeled with eYFP in advance to EAM induction, as described in Methods. Heart sections were immunostained for cTnI and YFP at EAM3w. Scale bar: 50  $\mu\text{m}$ .

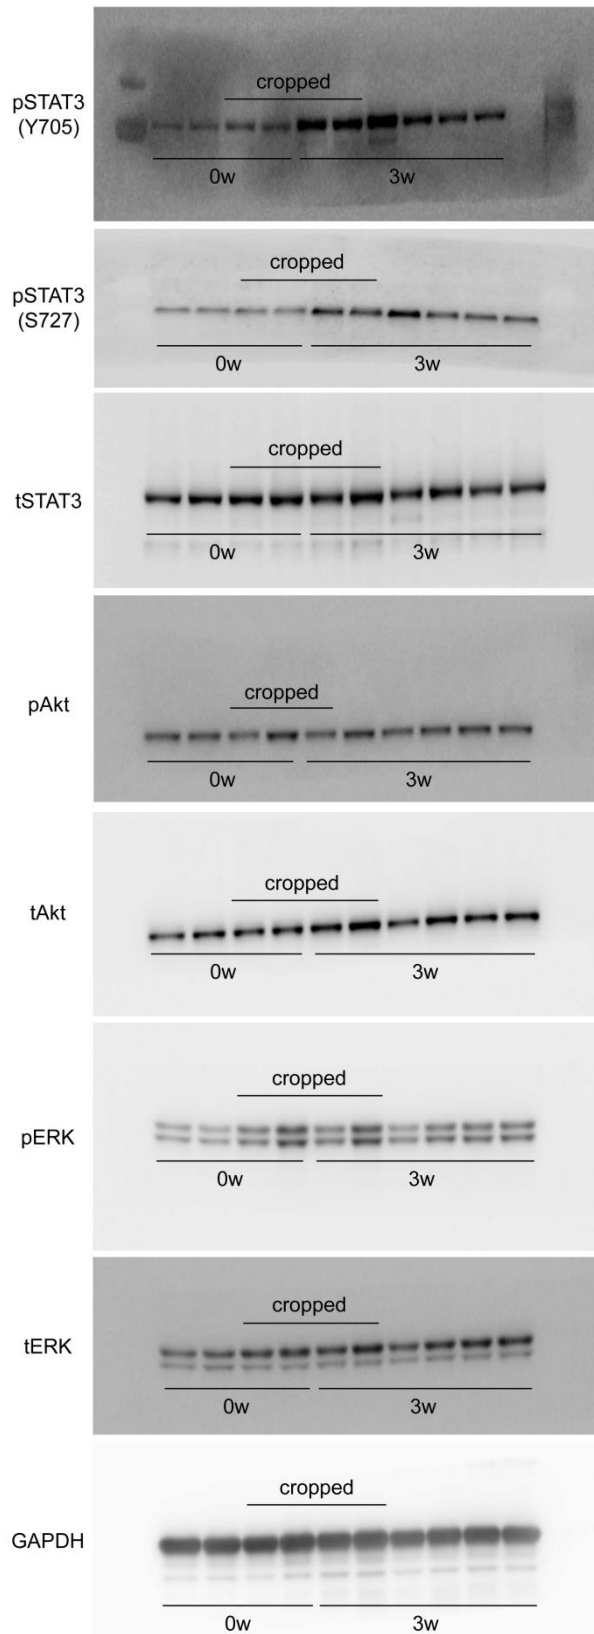

**Supplementary Figure S3. STAT3 was activated at EAM3w.**  
The full-length blots of Figure 4a are shown.

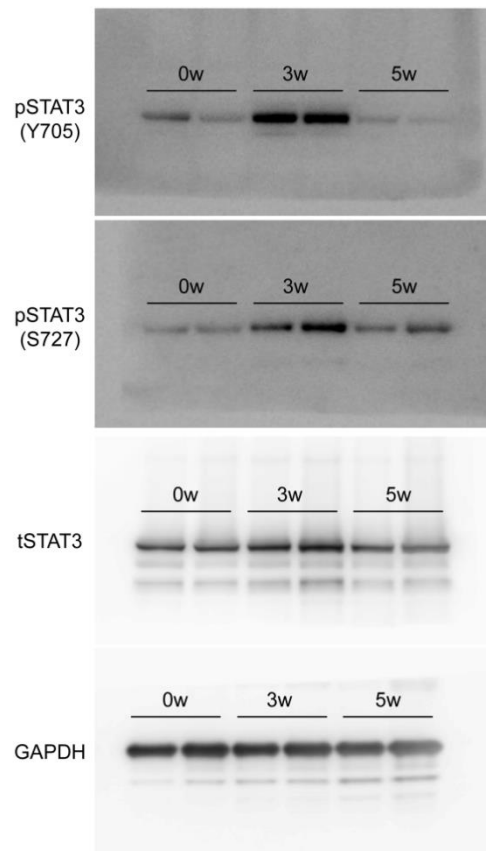

**Supplementary Figure S4. STAT3 activation was attenuated at EAM5w.**

Heart homogenates at EAM0w, EAM3w and EAM5w were subjected to immunoblotting with anti-pSTAT3 (Y705), anti-pSTAT3 (S727), anti-tSTAT3 and anti-GAPDH antibodies.

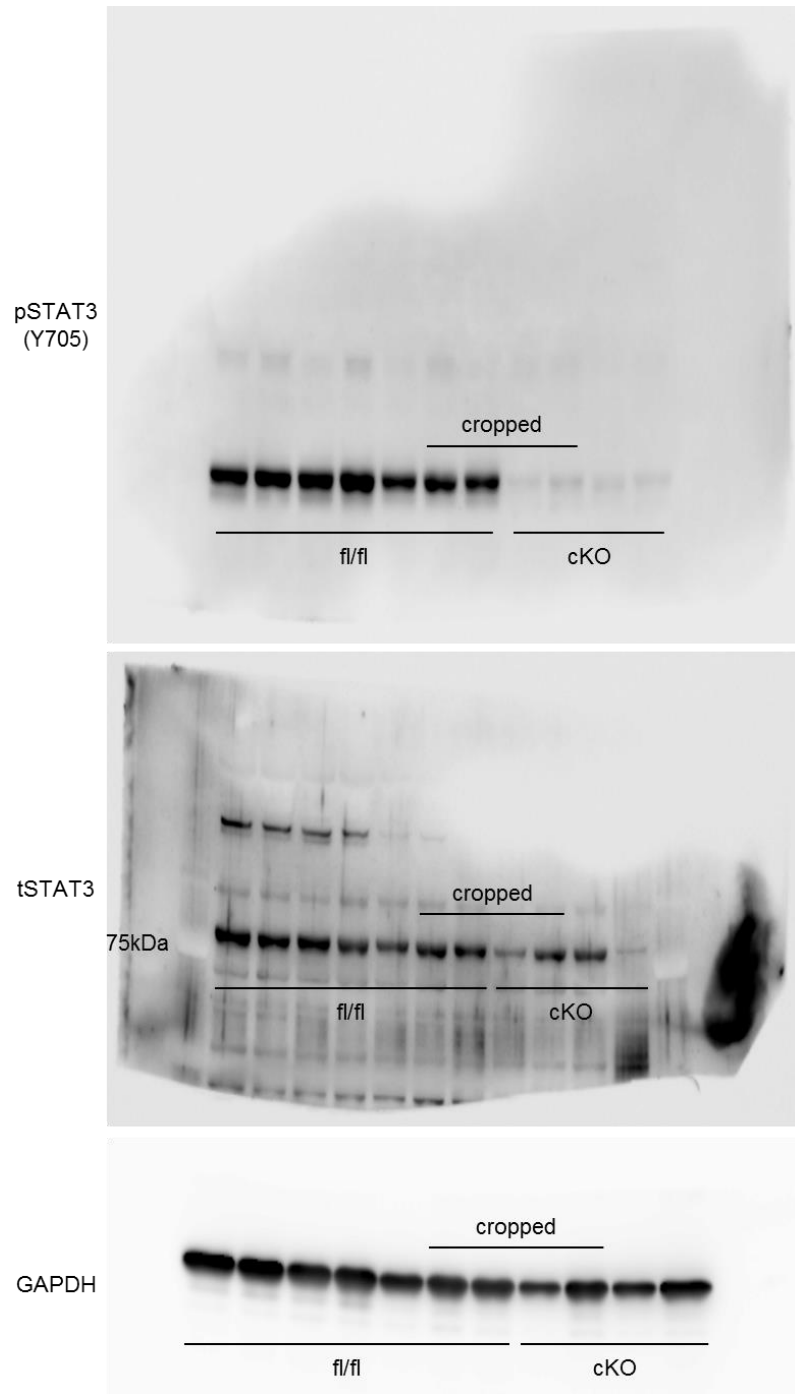

**Supplementary Figure S5. Cardiomyocyte STAT3 was deleted in STAT3cKO mice.**  
The full-length blots of Figure 5b are shown.

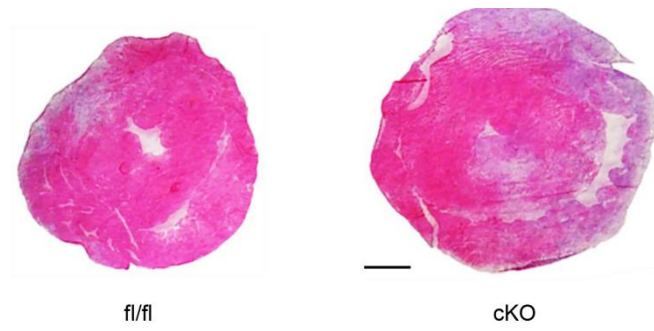

**Supplementary Figure S6. Cardiac tissue restoration was impaired in STAT3cKO mice.**

The entire HE-stained cross sections of STAT3<sup>fl/fl</sup> and STAT3<sup>cKO</sup> hearts at EAM5w are shown.

Scale bar: 1 mm.



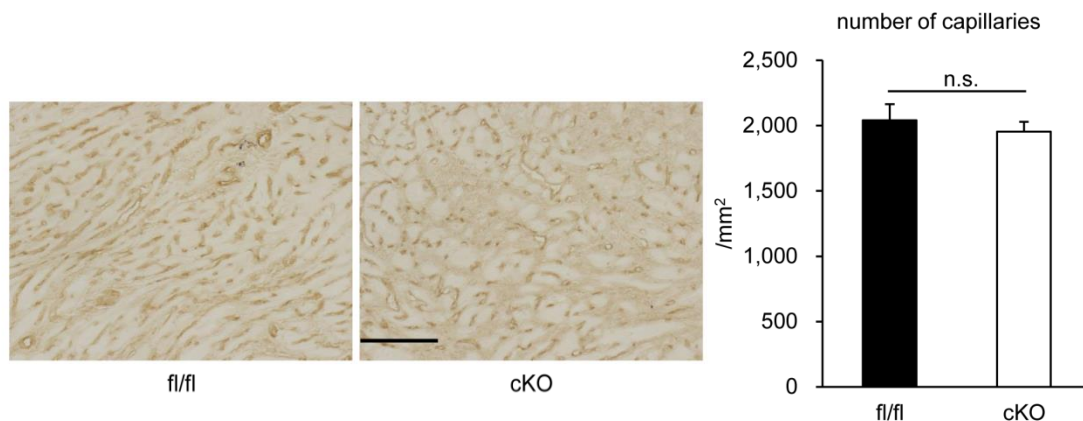

**Supplementary Figure S7. Capillary density was unaltered in STAT3cKO hearts.**

Immunohistochemical analysis with anti-CD31 antibody was performed for STAT3fl/fl and STAT3cKO heart sections at EAM5w. Left: representative images are shown. Scale bar: 100  $\mu$ m. Right: CD31<sup>+</sup> cells were counted in number and capillary density was calculated. n=7 mice for each group. Welch's *t*-test. Data are shown as mean  $\pm$  s.d.

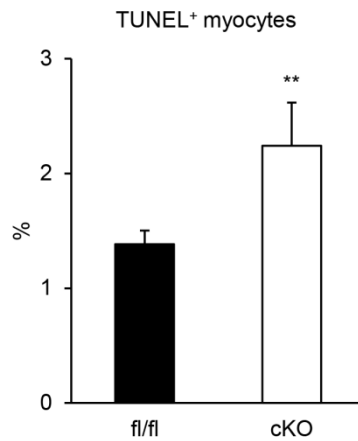

**Supplementary Figure S8. STAT3 protected cardiomyocytes in the inflamed heart.** TUNEL staining was performed for heart sections of STAT3fl/fl and STAT3cKO mice at EAM3w. TUNEL<sup>+</sup>MHC<sup>+</sup> cells in the inflamed region were counted and shown as percentage in MHC<sup>+</sup> cells. n=4 mice for fl/fl; 6 mice for cKO. Welch's *t*-test. \*\**P*<0.01. Data are shown as mean ± s.d.

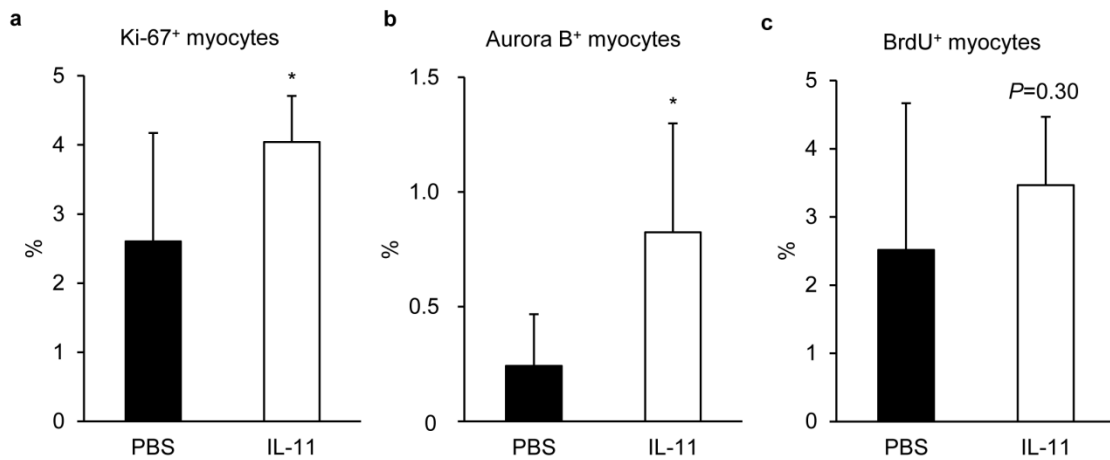

**Supplementary Figure S9. IL-11 administration enhanced cardiomyocyte proliferation at EAM3w.**

(a) Heart sections from PBS- or IL-11-treated mice at EAM3w were immunostained for Ki-67 and MHC. Ki-67<sup>+</sup>MHC<sup>+</sup> cells in the inflamed region were counted and the percentage of Ki-67<sup>+</sup>MHC<sup>+</sup> cells in MHC<sup>+</sup> cells is shown. n=8 mice for PBS; 6 mice for IL-11. (b) Heart sections from PBS- or IL-11-treated mice at EAM3w were immunostained for Aurora B and cTnI. Aurora B<sup>+</sup>cTnI<sup>+</sup> cells in the inflamed region were counted and the percentage of Aurora B<sup>+</sup>cTnI<sup>+</sup> cells in cTnI<sup>+</sup> cells is shown. n=8 mice for PBS; 6 mice for IL-11. (c) BrdU incorporation assay was performed for PBS- or IL-11-treated mice at EAM3w. Heart sections were immunostained for BrdU and MHC 24 hours after the last BrdU injection. BrdU<sup>+</sup>MHC<sup>+</sup> cells in the inflamed region were counted and the percentage of BrdU<sup>+</sup>MHC<sup>+</sup> cells in MHC<sup>+</sup> cells is shown. n=8 mice for PBS; 6 mice for IL-11. Welch's *t*-test. \**P*<0.05. Data are shown as mean ± s.d.

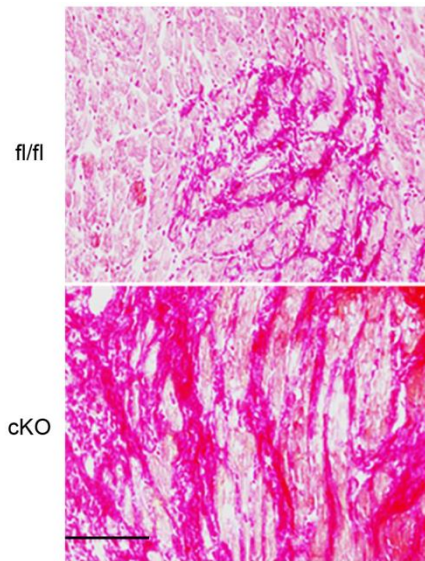

**Supplementary Figure S10. Rigid collagen fiber was observed in the injured area of STAT3cKO hearts at EAM5w.**

Picosirius red staining was performed for heart sections of STAT3fl/fl and STAT3cKO mice at EAM5w. Scale bar: 100  $\mu$ m.

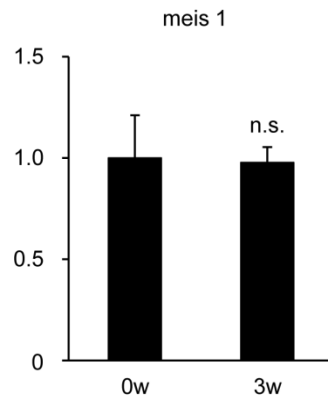

**Supplementary Figure S11. Meis1 expression was unchanged in EAM model.**

Cardiomyocytes were isolated at EAM0w and EAM3w, and meis1 mRNA expression was quantified by quantitative RT-PCR. The expression of meis1 was normalized to that of gapdh and shown as fold increase relative to 0w. n=7 mice for 0w; 6 mice for 3w. Welch's *t*-test. Data are shown as mean  $\pm$  s.d.

**Supplementary Table S1. Echocardiographic analysis of STAT3fl/fl and STAT3cKO mice.**

| EAM        | 0w           |              | 5w           |              |
|------------|--------------|--------------|--------------|--------------|
|            | fl/fl        | cKO          | fl/fl        | cKO          |
| FS (%)     | 48.6 ± 4.8   | 45.9 ± 8.6   | 44.2 ± 6.7   | 35.0 ± 8.5*  |
| LVIDd (mm) | 3.5 ± 0.3    | 3.5 ± 0.4    | 3.4 ± 0.3    | 3.6 ± 0.5    |
| LVIDs (mm) | 1.8 ± 0.3    | 1.9 ± 0.4    | 1.9 ± 0.4    | 2.4 ± 0.5    |
| IVSd (mm)  | 0.9 ± 0.1    | 0.9 ± 0.1    | 0.9 ± 0.1    | 0.9 ± 0.1    |
| LVPWd (mm) | 0.7 ± 0.1    | 0.7 ± 0.1    | 0.8 ± 0.1    | 0.8 ± 0.1    |
| HR (bpm)   | 469.4 ± 84.1 | 446.7 ± 45.9 | 468.0 ± 64.2 | 441.3 ± 66.2 |

FS: fractional shortening, LVIDd: left ventricular internal dimension in diastole, LVIDs: left ventricular internal dimension in systole, HR: heart rate, IVSd: interventricular septum thickness in diastole, LVPWd: left ventricular posterior wall thickness in diastole, HR: heart rate. Data are shown as mean ± s.d. n=9 mice for each group. Two-way repeated measures ANOVA. \* $P < 0.05$  vs cKO 0w.

**Supplementary Table S2. Antibodies.**

| Target            | Manufacturer   | Cat. #     |
|-------------------|----------------|------------|
| MHC               | Santa Cruz     | sc-20641   |
| cTnI              | Santa Cruz     | sc-8118    |
| Ki-67             | eBioscience    | 14-5698-80 |
| Aurora B          | Abcam          | ab2254     |
| BrdU              | Abcam          | ab6326     |
| $\alpha$ -actinin | Sigma          | A7811      |
| YFP               | MBL            | 598        |
|                   | SICGEN         | AB0020-200 |
| pSTAT3 (Y705)     | Abcam          | ab76315    |
|                   | Cell Signaling | 9131       |
| pSTAT3 (S727)     | Cell Signaling | 9134       |
| tSTAT3            | Cell Signaling | 4904       |
| pAkt              | Cell Signaling | 9271       |
| tAkt              | Cell Signaling | 9272       |
| pERK              | Cell Signaling | 9101       |
| tERK              | Cell Signaling | 9102       |
| GAPDH             | Millipore      | MAB374     |
| CD11b             | BD Pharmingen  | 550282     |
| vimentin          | Santa Cruz     | sc-7558-R  |
| CD31              | BD Pharmingen  | 553370     |

**Supplementary Table S3. Primer sequences.**

| Gene              | Direction | Sequence                          |
|-------------------|-----------|-----------------------------------|
| gapdh             | forward   | 5'-CATCACCATCTTCCAGGAGCG-3'       |
|                   | reverse   | 5'-GAGGGGCCATCCACAGTCTTC-3'       |
| IL-6              | forward   | 5'-AAGAGACTTCCTTCCAGTTGCCTTC-3'   |
|                   | reverse   | 5'-ATTATATCCAGTTTGGTAGCATCCATC-3' |
| IL-11             | forward   | 5'-CCATGAGCGCTGGGACATTG-3'        |
|                   | reverse   | 5'-TAGGGAAGGACCACCTGCAC-3'        |
| LIF               | forward   | 5'-TCCTATTACACAGCTCAAGG-3'        |
|                   | reverse   | 5'-ACTTGCTTGTATGTCCCCAG-3'        |
| OSM               | forward   | 5'-GAATCAGGCGAACCTCACG-3'         |
|                   | reverse   | 5'-GCATCCAGTTGGTACAAGACTC-3'      |
| CLCF1             | forward   | 5'-TACCTGGAGCATCAACTCCG-3'        |
|                   | reverse   | 5'-CGCCACACTTCCAAGTTGAC-3'        |
| CT-1              | forward   | 5'-TCTATGGCGAGTGGGTGAGC-3'        |
|                   | reverse   | 5'-AGCAAGCAAGCAAAGAAAGA-3'        |
| IL-1 $\beta$      | forward   | 5'-GACAAAATACCTGTGGCCTTGGGCC-3'   |
|                   | reverse   | 5'-GAGGTGCTGATGTACCAGTTGGGGA-3'   |
| IL-17A            | forward   | 5'-TTTAACTCCCTTGGCGCAAAA-3'       |
|                   | reverse   | 5'-CTTCCCTCCGCATTGACAC-3'         |
| TNF- $\alpha$     | forward   | 5'-CCATTCCTGAGTTCTGCAAAGG-3'      |
|                   | reverse   | 5'-AGGTAGGAAGGCCTGAGATCTTATC-3'   |
| TGF- $\beta$      | forward   | 5'-AGAGGTCACCCGCGTGCTAA-3'        |
|                   | reverse   | 5'-TCCCGAATGTCTGACGTATTGA-3'      |
| collagen type I   | forward   | 5'-GCGAGTGCTGTGCTTTCTG-3'         |
|                   | reverse   | 5'-TCCCTCGACTCCTACATCTTC-3'       |
| collagen type III | forward   | 5'-ATGCCACAGCCTTCTACAC-3'         |
|                   | reverse   | 5'-CCCAGGGTCACCATTTCTCC-3'        |
| cyclin D1         | forward   | 5'-GCGTACCCTGACACCAATCTC-3'       |
|                   | reverse   | 5'-CTCCTCTTCGCACTTCTGCTC-3'       |
| cyclin D2         | forward   | 5'-GAGTGGGAAGTGGTAGTGTTG-3'       |
|                   | reverse   | 5'-CGCACAGAGCGATGAAGGT-3'         |
| cyclin D3         | forward   | 5'-CGAGCCTCCTACTTCCAGTG-3'        |
|                   | reverse   | 5'-GGACAGGTAGCGATCCAGGT-3'        |
| cyclin E          | forward   | 5'-GTGGCTCCGACCTTTCAGTC-3'        |
|                   | reverse   | 5'-CACAGTCTTGTCAATCTTGGCA-3'      |
| cyclin A          | forward   | 5'-TGGATGGCAGTTTTGAATCACC-3'      |
|                   | reverse   | 5'-CCCTAAGGTACGTGTGAATGTC-3'      |



|           |         |                                  |
|-----------|---------|----------------------------------|
| cyclin B1 | forward | 5'-ATGCTGGACTACGACATGGTG-3'      |
|           | reverse | 5'-ACTGTAGGATAGGTAGTGCTGC-3'     |
| cdk2      | forward | 5'-CCTGCTTATCAATGCAGAGGG-3'      |
|           | reverse | 5'-GTGCTGGGTACACACTAGGTG-3'      |
| cdk4      | forward | 5'-ATGGCTGCCACTCGATATGAA-3'      |
|           | reverse | 5'-TCCTCCATTAGGAACTCTCACAC-3'    |
| cdk6      | forward | 5'-GGCGTACCCACAGAAACCATA-3'      |
|           | reverse | 5'-AGGTAAGGGCCATCTGAAAAC-3'      |
| MT1       | forward | 5'-CGTAGCTCCAGCTTCACCAGATCTC-3'  |
|           | reverse | 5'-TGGTGGCAGCGCTGTTTCGT-3'       |
| MT2       | forward | 5'-GCTTTTGCGCTCGACCCAATACTCTC-3' |
|           | reverse | 5'-GGAGCAGCAGCTTTTCTTGCAGGAAG-3' |
| clusterin | forward | 5'-AGCAGGAGGTCTCTGACAATG-3'      |
|           | reverse | 5'-GGCTTCCTCTAAACTGTTGAGC-3'     |
| meis1     | forward | 5'-TGATGACACGGCATCCACTCG-3'      |
|           | reverse | 5'-CCAAGCCATCACCTTGCTCAC-3'      |
